# Supplementary material for: Configuration-independent AIE-active supramolecular polymers of cyanostilbene through the photo-stable host–guest interaction of pillar[5]arene
Source: Royal Society of Chemistry journal article supplement (doi:10.1039/c7py00845g), 2017-01-01
Supplement: c7py00845g1.pdf [file c7py00845g1.pdf]

**Supporting information  
for**

**Configuration independent AIE-active supramolecular polymers of  
cyanostilbene through photo stable host-guest interaction of  
pillar[5]arene**

Manivannan Kalavathi<sup>a</sup>, Dhinakaran<sup>a</sup>, Wei Tao Gong<sup>\*a</sup>, YueYin<sup>b</sup>, Ali Wajahat<sup>a</sup>, Xiaojun Kuang<sup>a</sup>,  
Leyong Wang<sup>c,d</sup>, Guiling Ning<sup>a</sup>.

<sup>a</sup>A State Key Laboratory of Fine Chemicals, School of Chemical Engineering, Dalian University of Technology, Dalian 610023. PR. China. Fax: +86 411-8498-6065; Tel: +86-411-8498-6067; E-mail: wtong@dlut.edu.cn.

<sup>b</sup>Jiangsu Key Laboratory of Advanced Catalytic Materials and Technology, School of Petrochemical Engineering, Changzhou University, Changzhou 213164, P. R. China.

<sup>c</sup>Key Laboratory of Mesoscopic Chemistry of MOE, Collaborative Innovation Center of Chemistry for Life Sciences, School of Chemistry and Chemical Engineering, Nanjing University, Nanjing, China

<sup>d</sup>Institute for Natural & Synthetic Organic Chemistry, Changzhou University, Changzhou, 213164, China

## Table of content

---

|                 |                                                                                                                                  |           |
|-----------------|----------------------------------------------------------------------------------------------------------------------------------|-----------|
| <b>S.I.1:</b>   | Synthesis and characterization.                                                                                                  |           |
| <b>S.I.1.1:</b> | Synthesis and characterization of pillar[5]arene linked phenyl acetonitrile ( <b>1</b> ).                                        | <b>3</b>  |
| <b>S.I.1.2:</b> | Synthesis and characterization of pillar[5]arene linked benzaldehyde ( <b>2</b> ).                                               | <b>4</b>  |
| <b>S.I.1.3:</b> | Synthesis and characterization of ( <b>Z</b> )CNS( <b>P5</b> ) <sub>2</sub> .                                                    | <b>6</b>  |
| <b>S.I.1.4:</b> | Synthesis and characterization of control molecule ( <b>Z</b> )CNS( <b>MOP</b> ) <sub>2</sub> .                                  | <b>8</b>  |
| <b>S.I.1.5:</b> | Synthesis and characterization of Guest <b>G1</b> .                                                                              | <b>11</b> |
| <b>S.I.2:</b>   | Supramolecular polymerization.                                                                                                   | <b>12</b> |
| <b>S.I.2.1:</b> | Fluorescence studies.                                                                                                            | <b>12</b> |
| <b>S.I.2.2:</b> | DLS studies.                                                                                                                     | <b>12</b> |
| <b>S.I.2.2:</b> | NMR studies.                                                                                                                     | <b>13</b> |
| <b>S.I.3:</b>   | AIE studies.                                                                                                                     | <b>14</b> |
| <b>S.I.4:</b>   | Photoresponsive studies.                                                                                                         | <b>15</b> |
| <b>S.I.4.1:</b> | <sup>1</sup> H NMR studies.                                                                                                      | <b>15</b> |
| <b>S.I.4.2:</b> | Fluorescence studies.                                                                                                            | <b>16</b> |
| <b>S.I.4.3:</b> | AIE studies.                                                                                                                     | <b>17</b> |
| <b>S.I.5:</b>   | Time-resolved fluorescence decay of ( <b>Z</b> )CNS( <b>P5</b> ) <sub>2</sub> and ( <b>Z</b> )G1CCNS( <b>P5</b> ) <sub>2</sub> . | <b>18</b> |
| <b>S.I.6:</b>   | Reference.                                                                                                                       | <b>18</b> |

## S.I. 1: Synthesis and characterization.

### S.I. 1.1: Synthesis and characterization of pillar[5]arene linked phenyl acetonitrile 1.<sup>1</sup>

To the stirred solution of 4-hydroxyphenylacetonitrile, **7** (2.65 mmol., 0.352 g) and  $K_2CO_3$  (3.98 mmol., 0.549 g) in 20 ml acetonitrile under argon, copillar[5]arene, **6** (3.45 mmol, 3 g) and KI ( $0.4 \times 10^{-3}$  mol., 0.066 g) were added. The reaction mixture was refluxed under argon for 24 hours. After confirming the completion of the reaction by TLC, acetonitrile was removed under vacuum, then reaction mixture was further diluted with DCM and washed with water thrice, The DCM layer was dried with anhydrous  $MgSO_4$  and evaporated under vacuum to obtain the crude product, which was further purified by column chromatography to give **1** as white solid, Yield = 77% (1.883 g).

**<sup>1</sup>H NMR** (400 MHz,  $CDCl_3$ , 298K): 7.18(d,  $J = 8$  Hz, 2H, Ar-H), 6.88(d,  $J = 8$  Hz, 1H, Ar-H), 6.85(d,  $J = 8$  Hz, 2H, Ar-H), 6.78(m, 6.78-6.72, 9H, Ar-H), 4.00(t,  $J = 4$  Hz, 2H,  $OCH_2$ ), 3.90(t,  $J = 4$  Hz, 2H,  $OCH_2$ ), 3.79(m, 3.79-3.77, 10H,  $CH_2$ ), 3.66(m, 3.66-3.62, 29H,  $OCH_3$  &  $CH_2CN$ ), 2.01(m, 2.01-1.94, 4H,  $CH_2$ ).

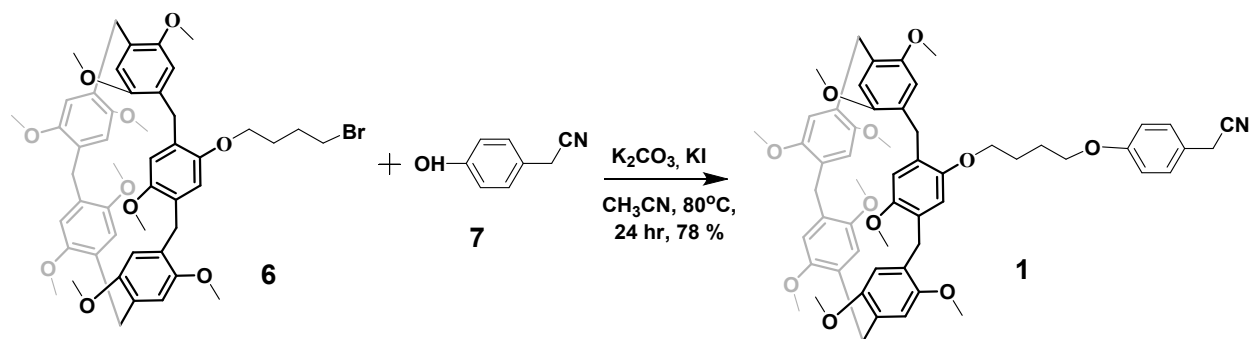

**Scheme S.I.1:** Synthesis of Pillar[5]arene linked phenylacetonitrile (**1**).

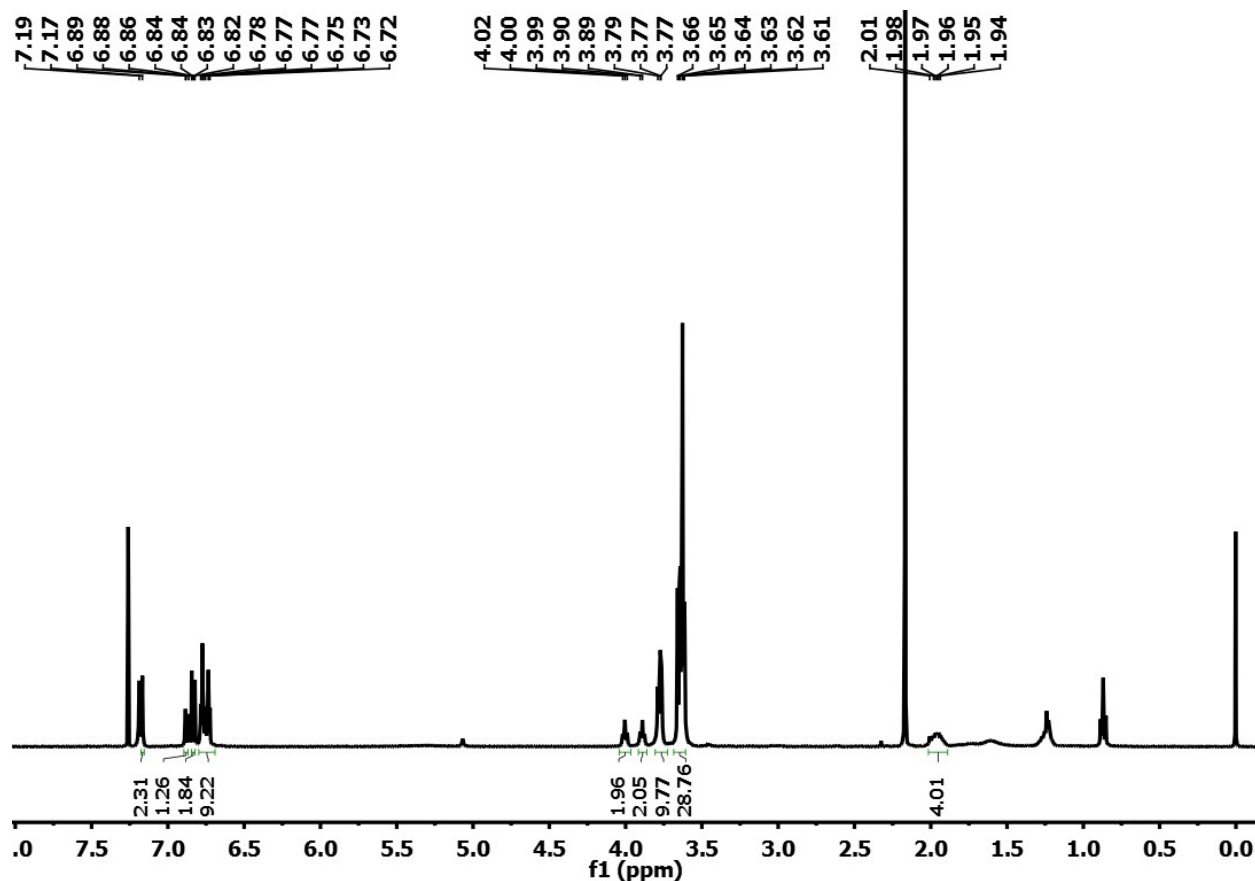

Fig.S.I.1:  $^1\text{H}$  NMR spectrum of Pillar[5]arene linked phenylacetonitrile (**1**).

### S.I. 1.2 : Synthesis and characterization of pillar[5]arene linked benzaldehyde **2**.<sup>1</sup>

To the stirred solution of 4-hydroxybenzaldehyde, **8** (2.65 mmol, 0.323 g) and  $\text{K}_2\text{CO}_3$  (3.98 mmol, 0.549 g) in 20 ml acetonitrile under argon pillar[5]arene, **6** (3.45 mmol, 3 g) and KI (0.4 mmol, 0.066 g) was added. The reaction mixture was refluxed under argon for 24 hours. After confirming the completion of the reaction by TLC, acetonitrile was removed under vacuum, the reaction mixture was further diluted with DCM and washed with water thrice, The DCM layer was dried with anhydrous  $\text{MgSO}_4$  and evaporated under vacuum to obtain the crude product, which was further purified by column chromatography to give **2** as white solid. Yield = 81% (1.957 g).  $^1\text{H}$  NMR (400 MHz,  $\text{CDCl}_3$ , 298K): 9.89(1H, s), 7.82(d,  $J = 8$  Hz, 2H, Ar-H), 6.95(d,  $J = 8$  Hz, 2H, Ar-H), 6.80(m, 6.80-6.73, 10H, Ar-H), 3.99(t,  $J = 4$  Hz, 2H,  $\text{OCH}_2$ ), 3.90(t,  $J = 4$  Hz, 2H,  $\text{OCH}_2$ ), 3.79(m, 3.79-3.77, 10H,  $\text{CH}_2$ ), 3.66(m, 3.66-3.62, 27H,  $\text{OCH}_3$ ), 1.96(m, 1.96-1.90, 4H,  $\text{CH}_2$ ).

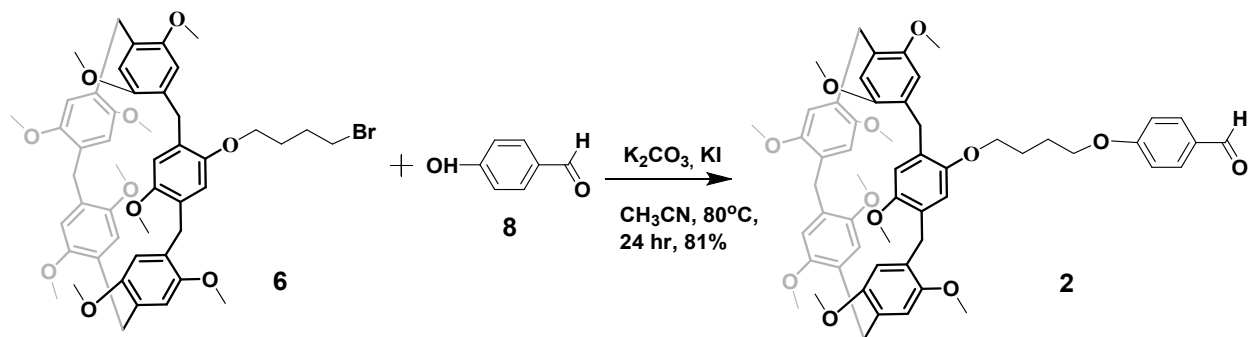

**Scheme S.I.2:** Synthesis of pillar[5]arene linked benzaldehyde (**2**).

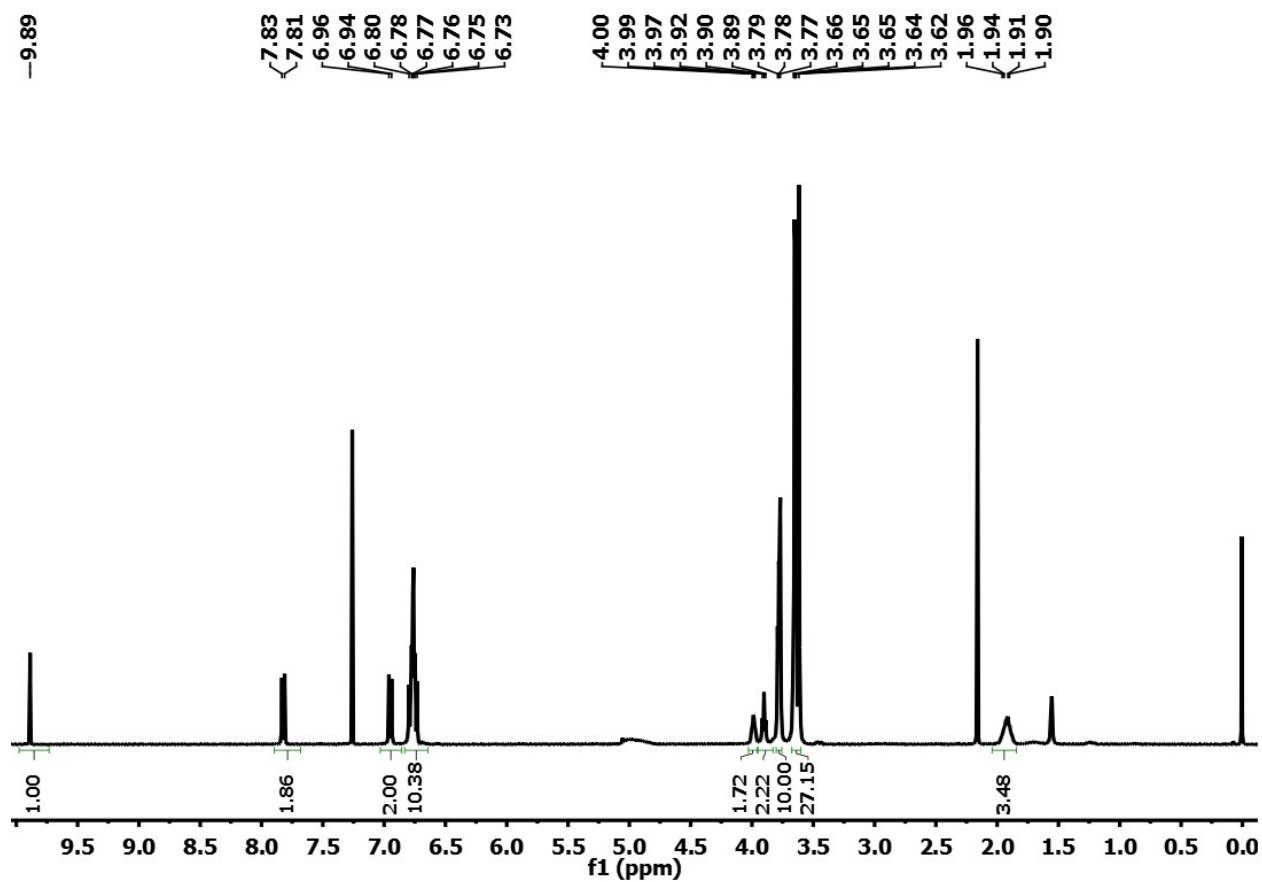

**Fig.S.I.2:** <sup>1</sup>H NMR spectrum of Pillar[5]arene linked benzaldehyde (**2**).

**S.I.1.3: Synthesis and characterization of cyanostilbene bridged Pillar[5]arene dimer -(Z)CNS(P5)<sub>2</sub>.**

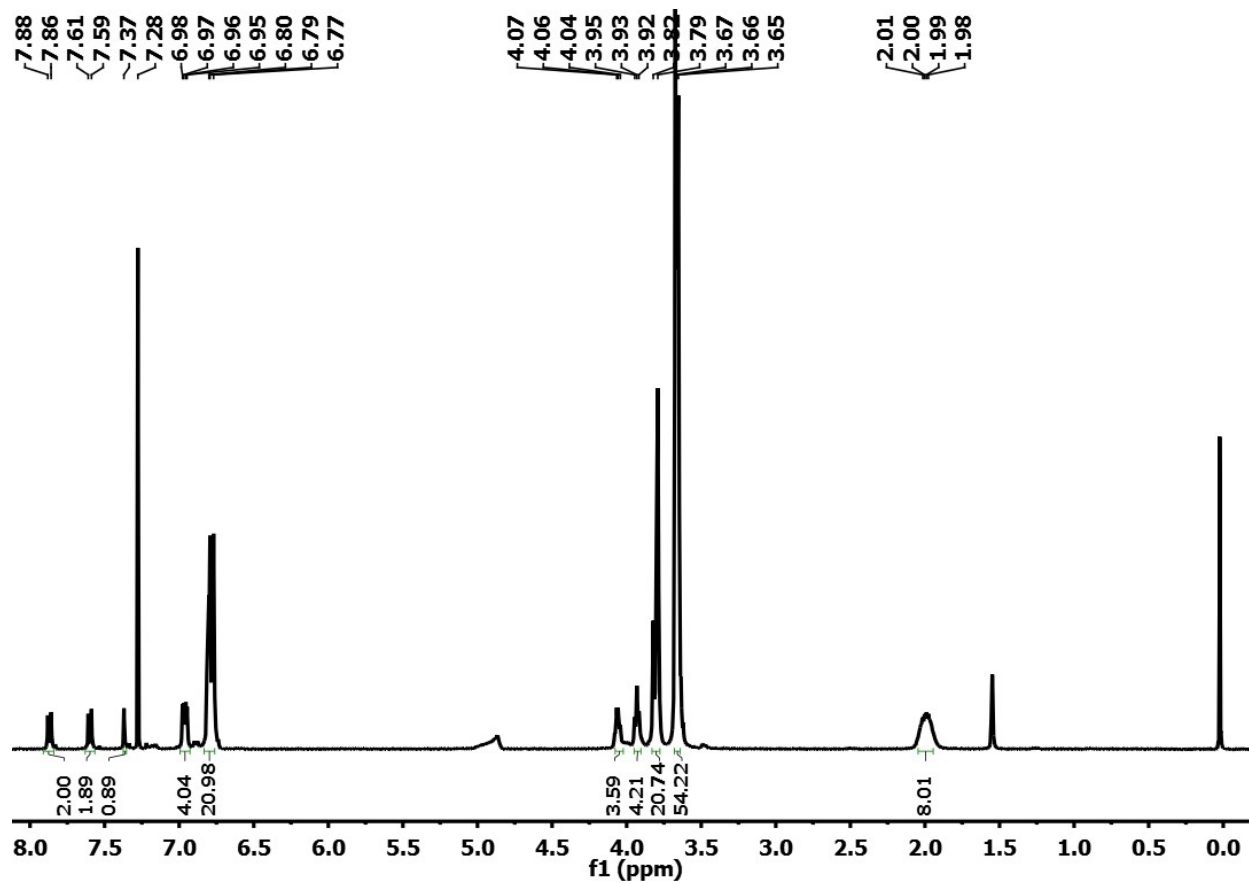

**Fig.S.I.3:** <sup>1</sup>H NMR spectrum of (Z)CNS(P5)<sub>2</sub>.

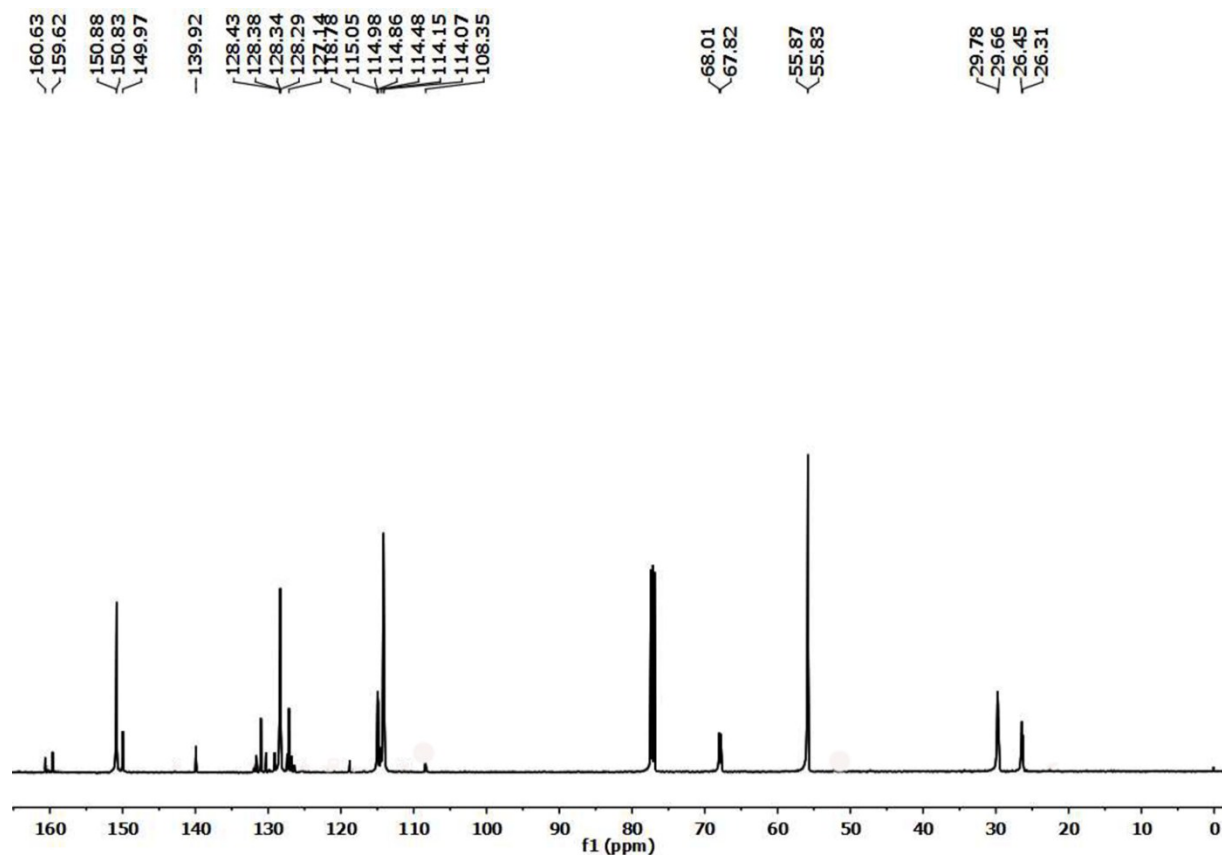

Fig.S.I.4:  $^{13}\text{C}$  NMR spectrum of  $(Z)\text{CNS}(\text{P}5)_2$ .

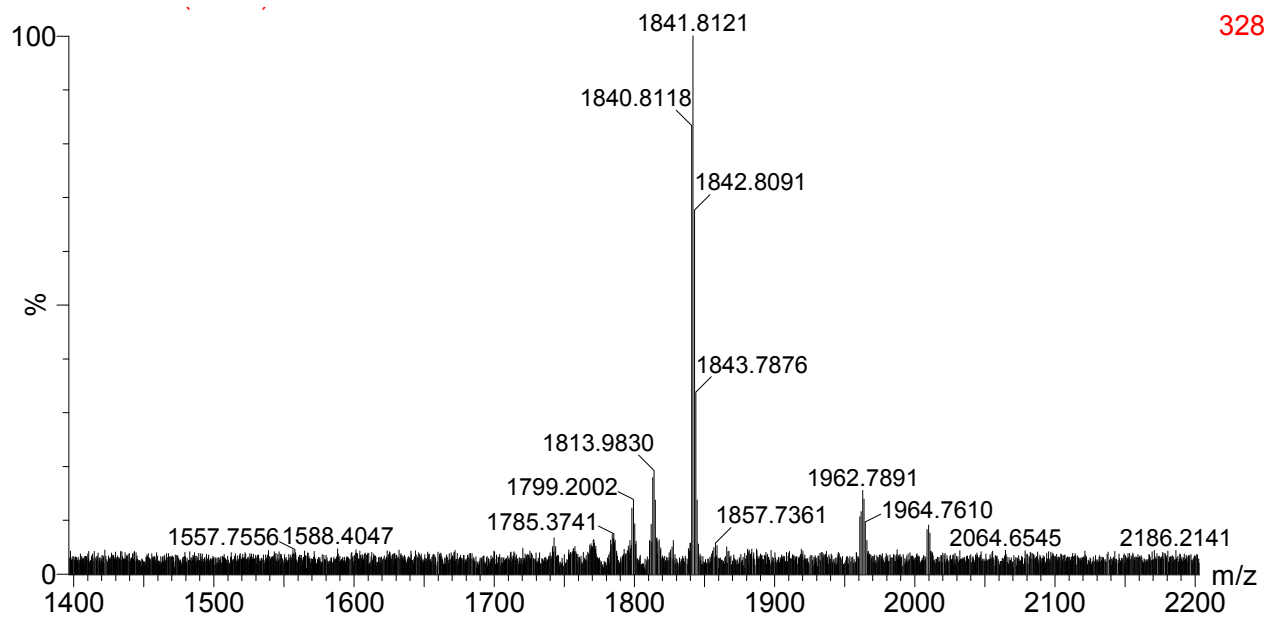

Fig.S.I.5: MALDI-TOF mass spectrum of  $(Z)\text{CNS}(\text{P}5)_2$ .

#### S.I.1.4: Synthesis and characterization of (Z)CNS(MOP)<sub>2</sub>.

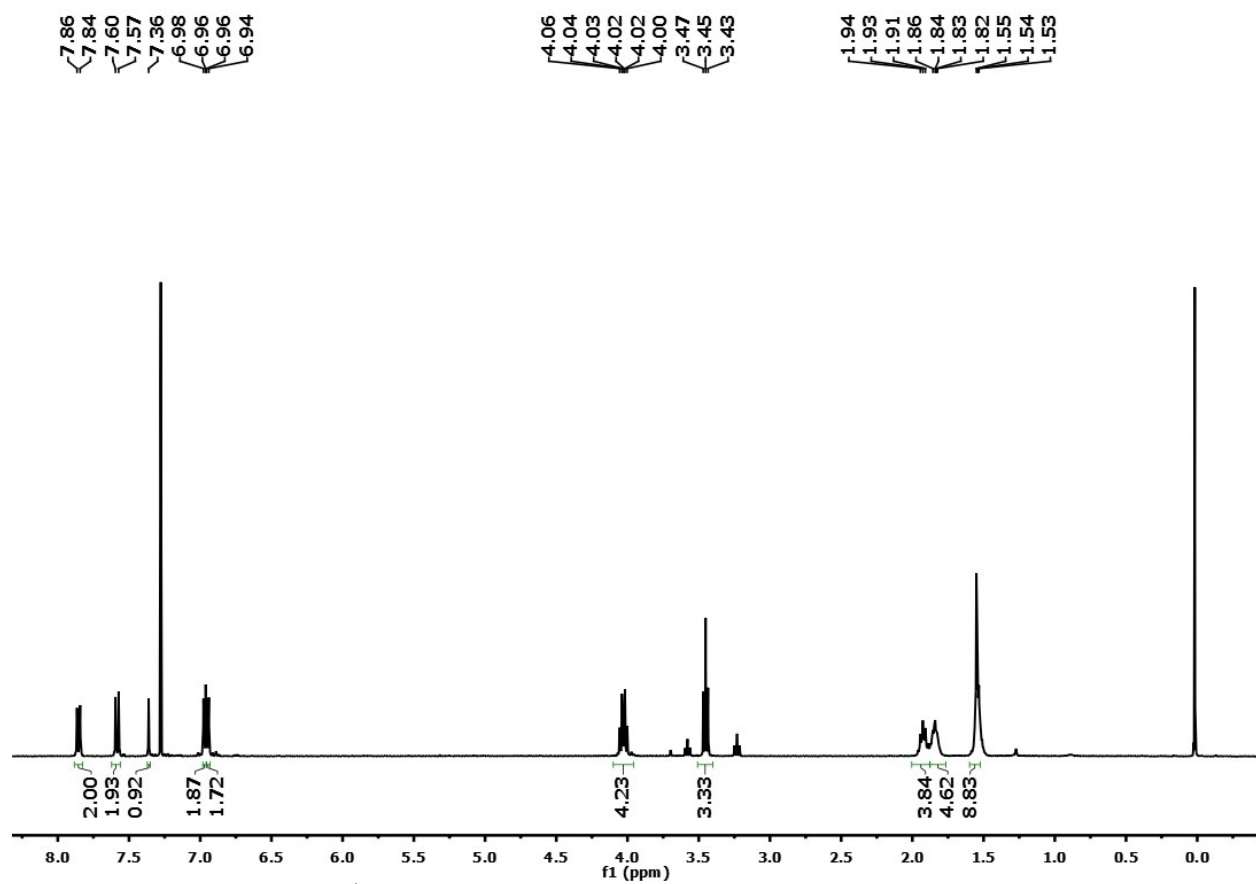

Fig.S.I. 6: <sup>1</sup>H NMR spectrum of bis(bromo-hexyloxy) cyanostilbene (**5**).



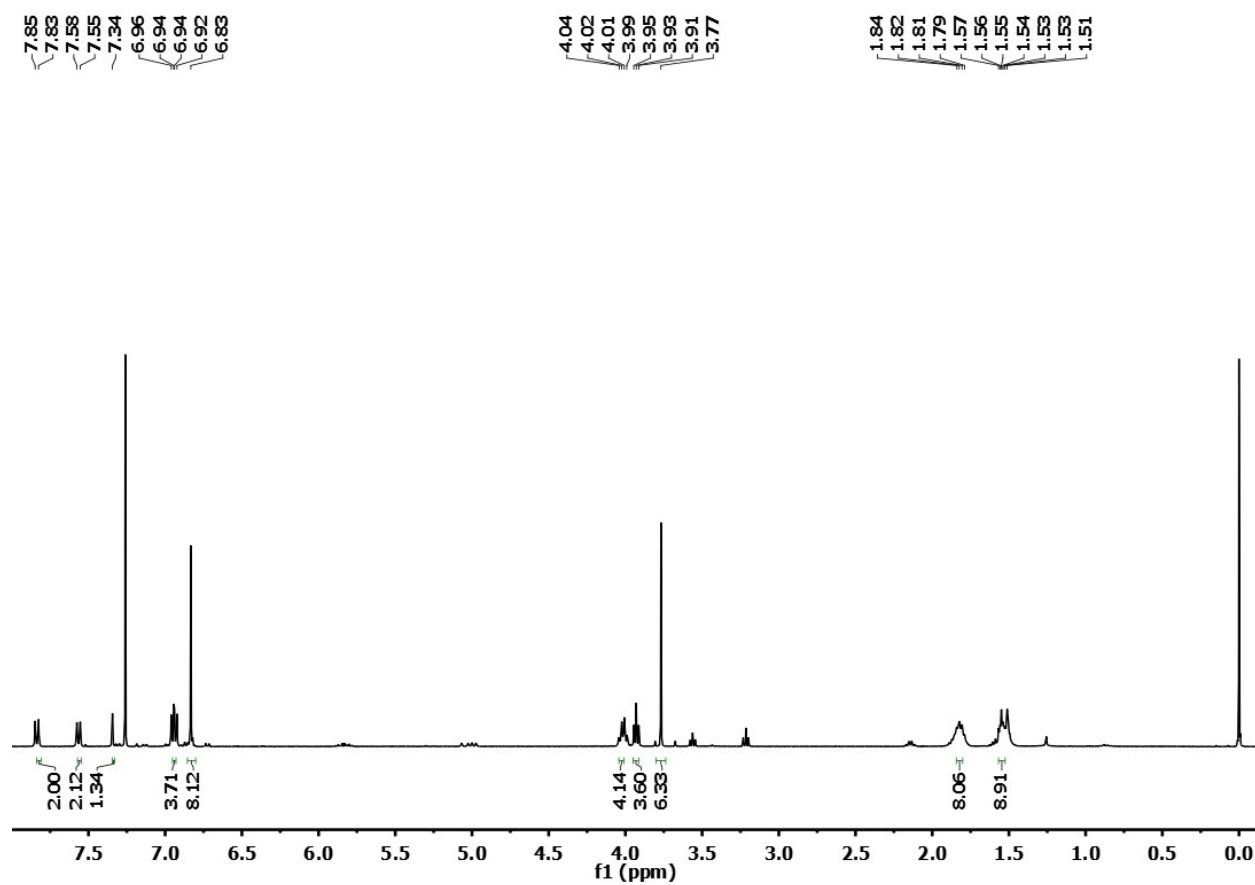

**Fig.S.I.7:**  $^1\text{H}$  NMR spectrum of  $(Z)\text{CNS}(\text{MOP})_2$ .

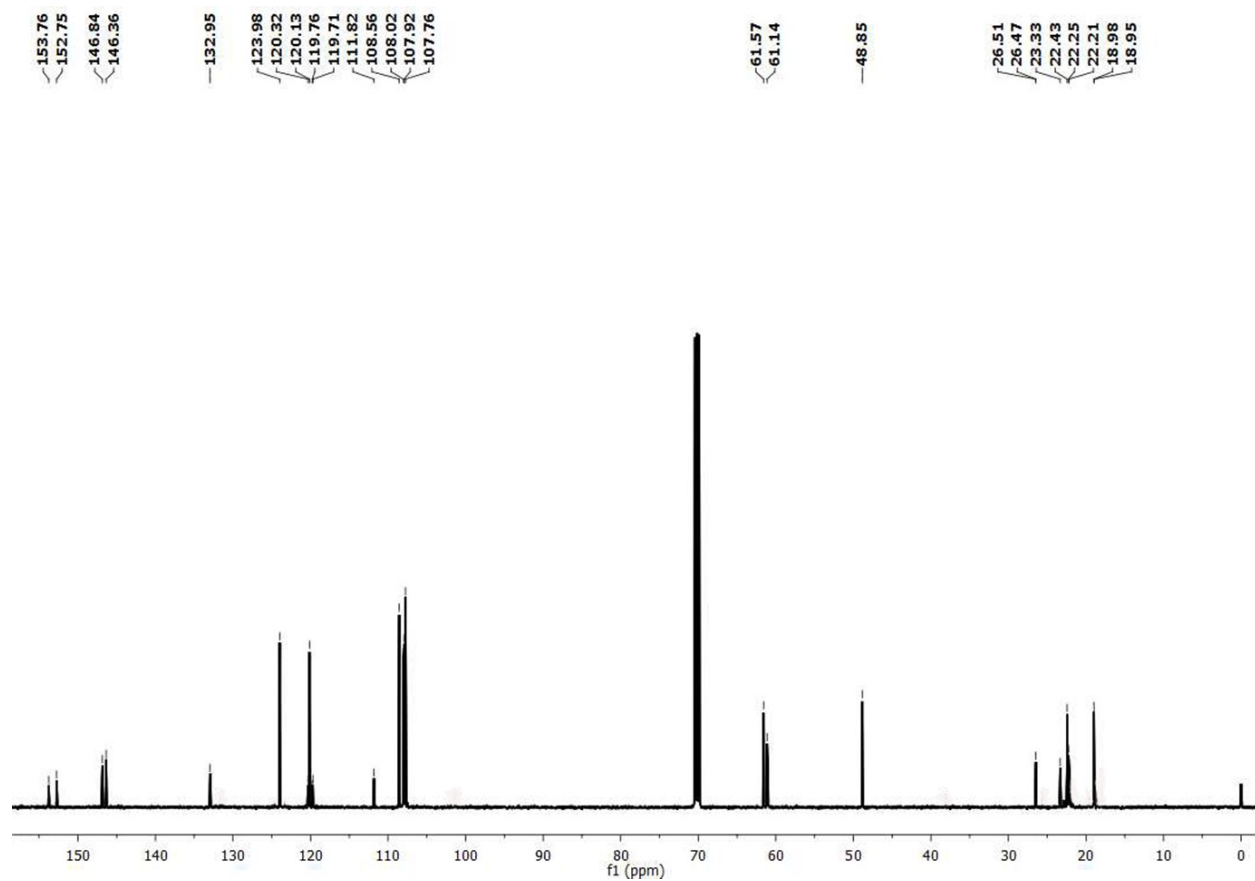

Fig. S.I.8:  $^{13}\text{C}$  NMR spectrum of  $(Z)\text{CNS}(\text{MOP})_2$ .

### S.I. 1.5: Synthesis and characterization of guest (G1).

The bis(nitrile triazole) guest G1 was synthesized according to reported literature.<sup>2</sup>

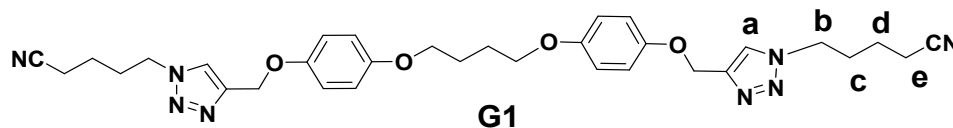

**<sup>1</sup>H NMR** (400 MHz, CDCl<sub>3</sub>, 298K): 7.61(s, 2H, Trz-H), 6.90(d, *J* = 8 Hz, 4H, Ar-H), 6.82(d, *J* = 8 Hz, 4H, Ar-H), 5.16(s, 4H, OCH<sub>2</sub>), 4.42(t, *J* = 8 Hz, 4H, OCH<sub>2</sub>), 3.97(t, *J* = 4 Hz, 4H, OCH<sub>2</sub>), 2.39(t, *J* = 8 Hz, 4H, CH<sub>2</sub>), 2.12(m, 2.12-2.05, 4H, CH<sub>2</sub>), 1.94(m, 1.94-1.92, 4H, CH<sub>2</sub>), 1.71(m, 1.71-1.66, 4H, CH<sub>2</sub>).

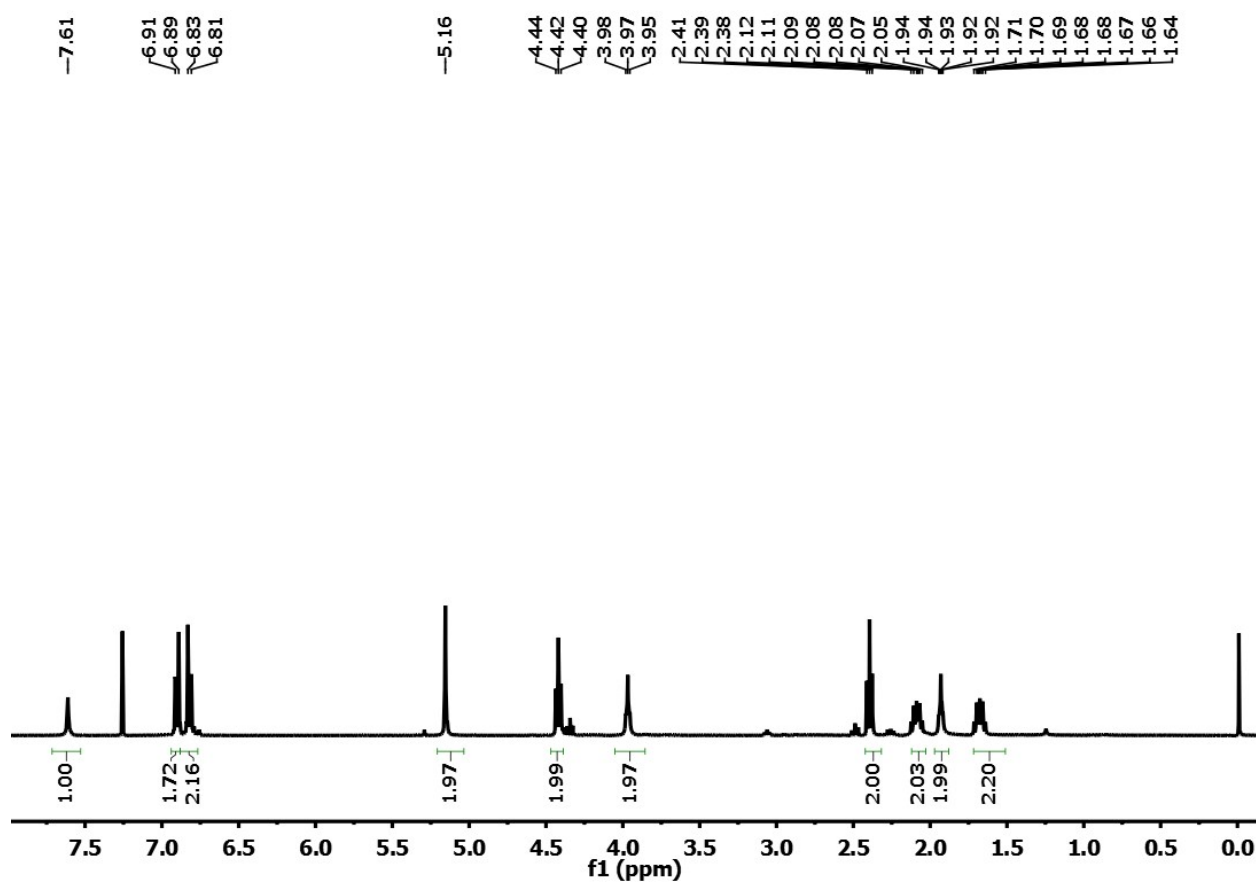

Fig. S.I.9: <sup>1</sup>H NMR spectrum of G1.

## S.I.2: Supramolecular polymerization.

### S.I.2.1: Fluorescence studies.

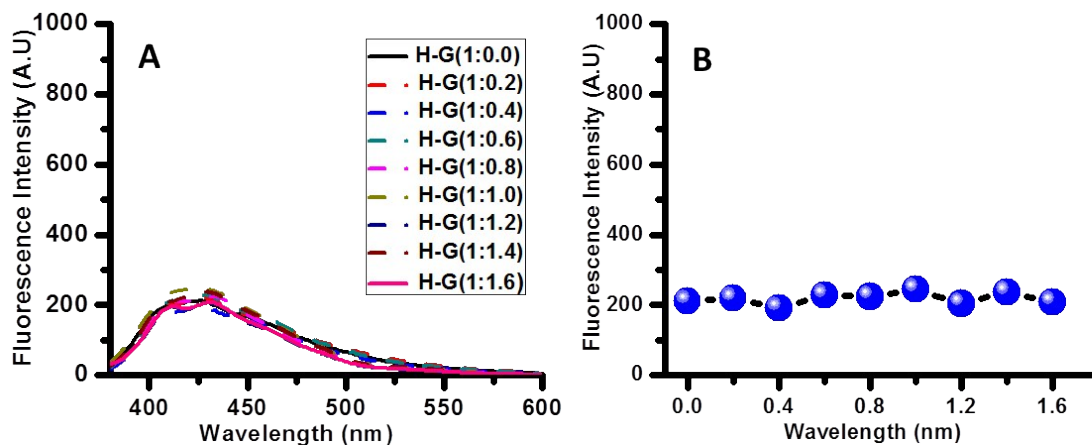

**Fig. S.I.10:** Fluorescence spectra of A)  $(Z)G1cCNS(P5)_2$ , [ $(Z)CNS(P5)_2$  = 0.1 mM fixed], Profiles of fluorescence emission intensity changes at  $\lambda_{em} = 430$  nm against Guest molar ratio B)  $(Z)G1cCNS(P5)_2$ . Note:  $\lambda_{ex} = 360$  nm, H =  $(Z)CNS(P5)_2$ , G = **G1**. Solvent =  $CHCl_3$ .

### S.I.2.2: DLS studies.

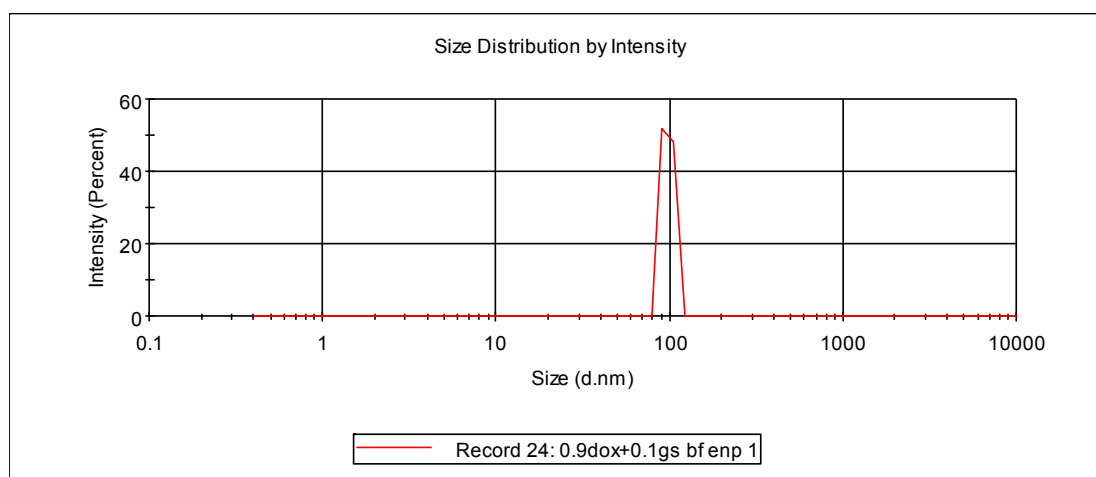

**Fig.S.I.11:** DLS data for  $(Z)G1cCNS(P5)_2$  in THF (25 mM).

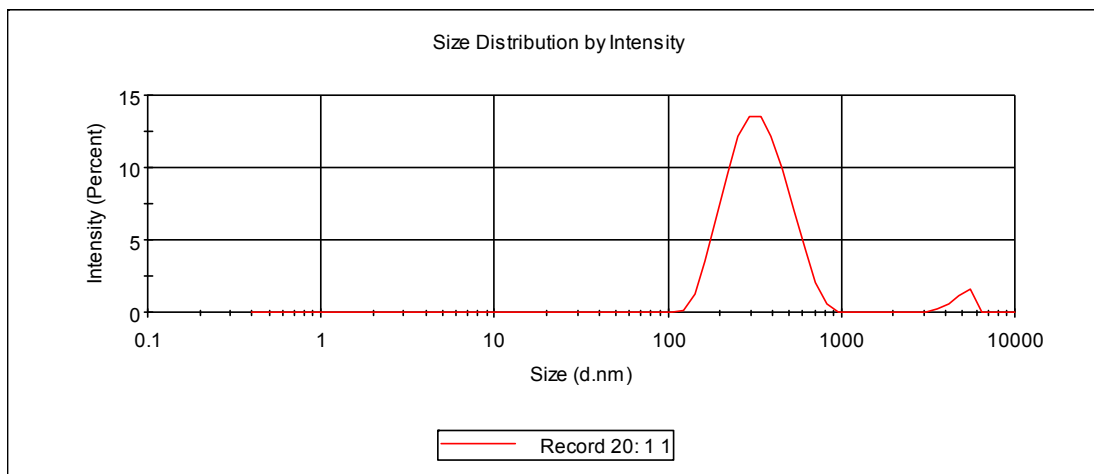

**Fig.S.I.12:** DLS data for **(Z)G1cCNS(P5)<sub>2</sub>** in CHCl<sub>3</sub> (25 m).

### S.I.2.1: NMR studies.

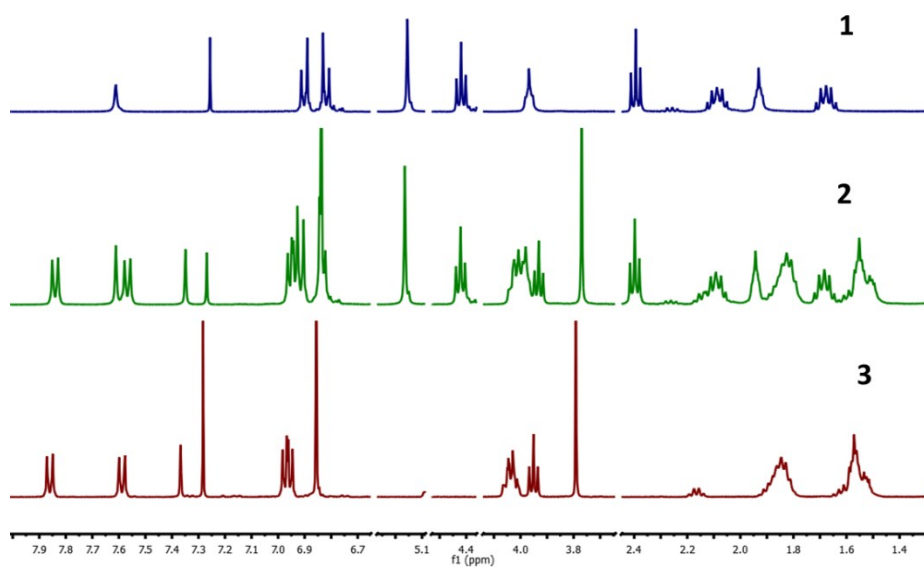

**Fig. S.I.13 :** Partial <sup>1</sup>H NMR(400MHz, CDCl<sub>3</sub>, 298 K) of of 1) 20 mMole **G1**, 2) 27 mMole **G1** + 30 mmol **(Z)CNS(MOP)<sub>2</sub>**, 3)15 mMole **(Z)CNS(MOP)<sub>2</sub>**.

### S.I. 3: AIE studies.

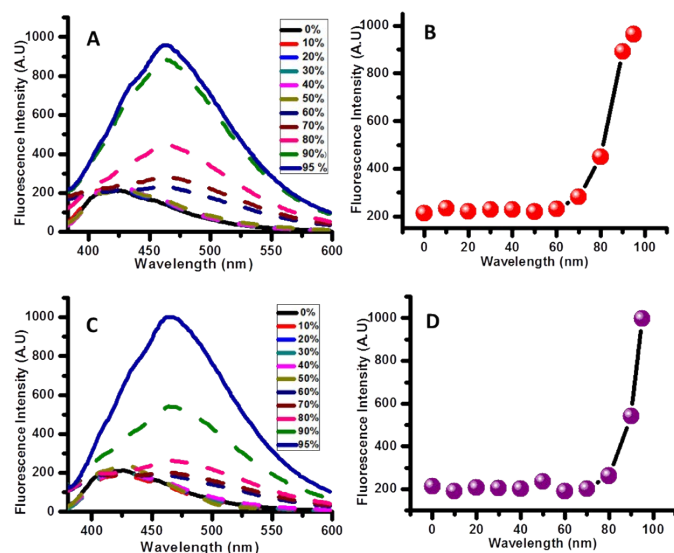

**Fig.S.I.14:** Fluorescence spectra of A) (Z)CNS(P5)<sub>2</sub>, B) (Z)G1cCNS(P5)<sub>2</sub>, in THF-water mixture with increasing the proportion of water from 0-95%. Profiles of fluorescence emission intensity changes at  $\lambda_{em} = 430$  nm against water proportion C) (Z)CNS(MOP)<sub>2</sub>, D) (Z)G1cCNS(MOP)<sub>2</sub>. Note:  $\lambda_{ex} = 360$  nm.

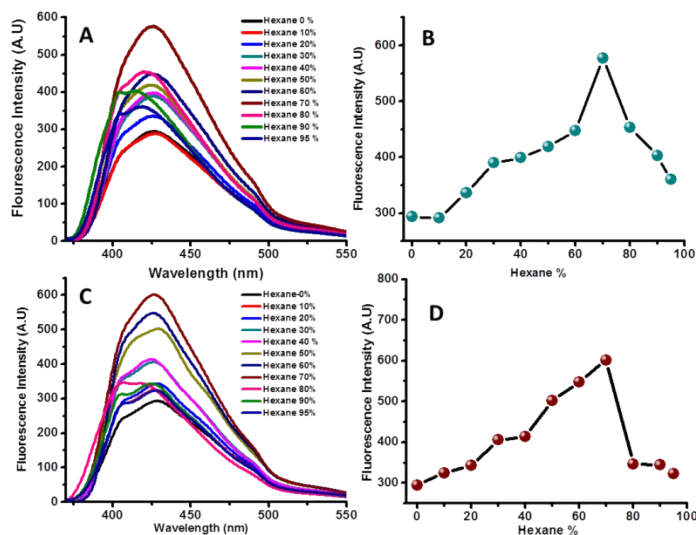

**Fig.S.I.15:** Fluorescence spectra of A) (Z)CNS(MOP)<sub>2</sub>, B) (Z)G1cCNS(MOP)<sub>2</sub>, in CHCl<sub>3</sub>-Hexane mixture with increasing the proportion of hexane from 0-95%. Profiles of fluorescence emission intensity changes at  $\lambda_{em} = 430$  nm against hexane proportion, C) (Z)CNS(MOP)<sub>2</sub>, D) (Z)G1cCNS(MOP)<sub>2</sub>. Note:  $\lambda_{ex} = 360$  nm.

## S.I. 4: Photoresponsive studies.

### S.I.4.1. NMR studies.

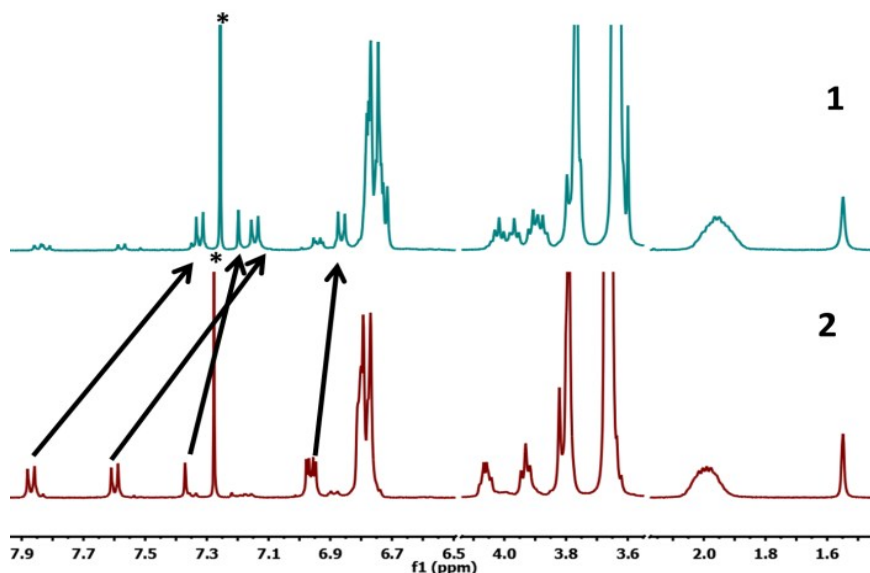

**Fig. S.I.16:** <sup>1</sup>H NMR(400MHz, CDCl<sub>3</sub>, 298 K) 10 mMol of (Z)CNS(P5) 1)Before irradiation, 2)After irradiation of UV 365 nm for 2 hrs. \*Solvent peak

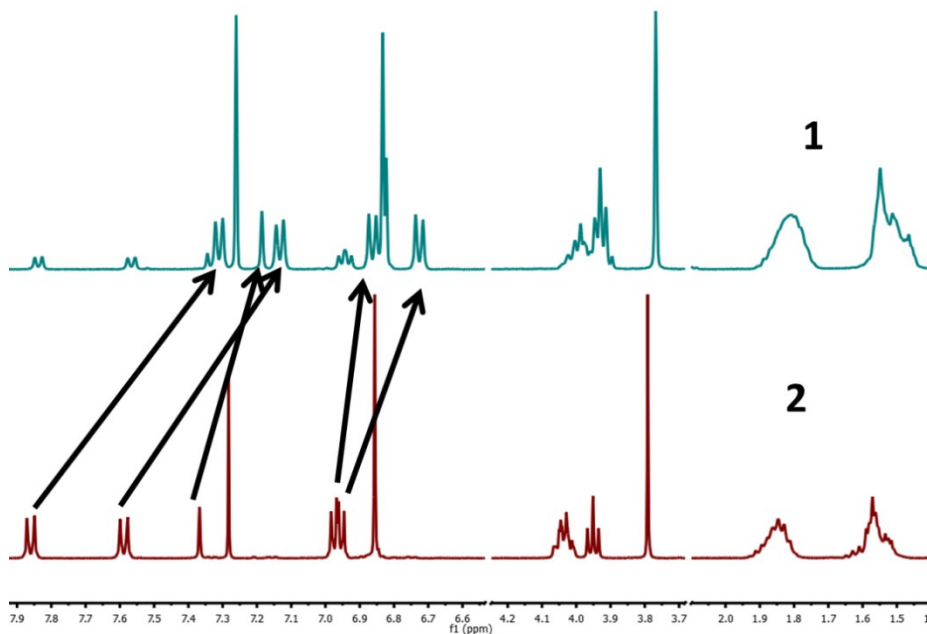

**Fig. S.I.17:** <sup>1</sup>H NMR(400MHz, CDCl<sub>3</sub>, 298 K) 15 mMol. of (Z)CNS(MOP)<sub>2</sub> 1)Before irradiation, 2)After irradiation of UV (365 nm) for 2 hrs. \*Solvent peak.

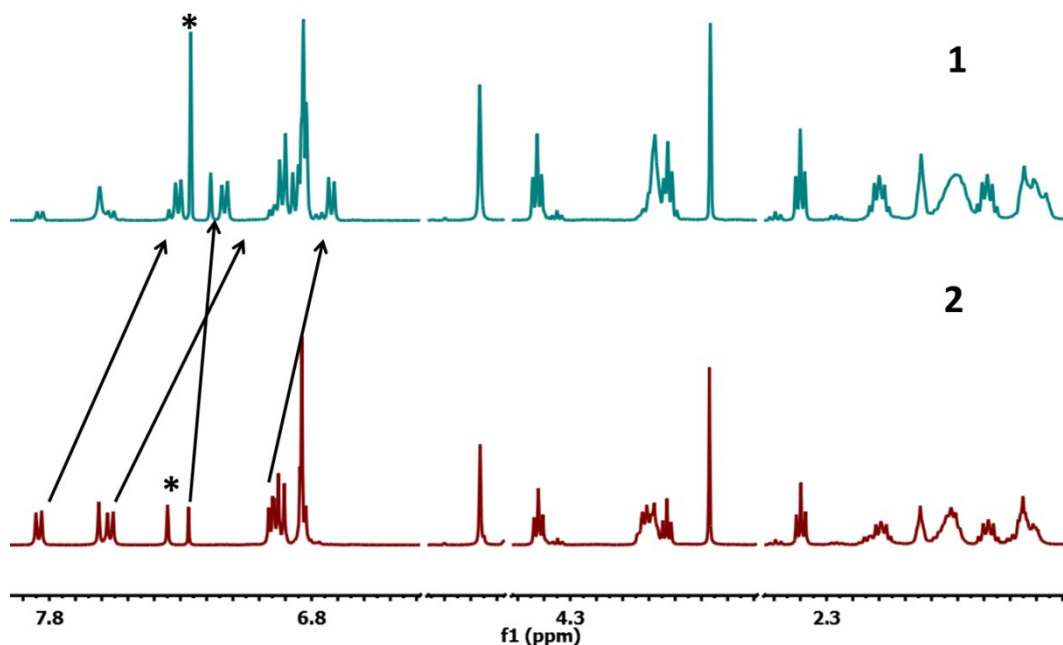

**Fig.S.I.18:**  $^1\text{H}$  NMR(400MHz,  $\text{CDCl}_3$ , 298 K) of **(Z)G1cCNS(MOP) $_2$**  20 mmol., Before irradiation, 2) 10 mmol., After irradiation of UV (365 nm) for 2 hrs. \*Solvent peak.

#### S.I. 4.2: Fluorescence studies.

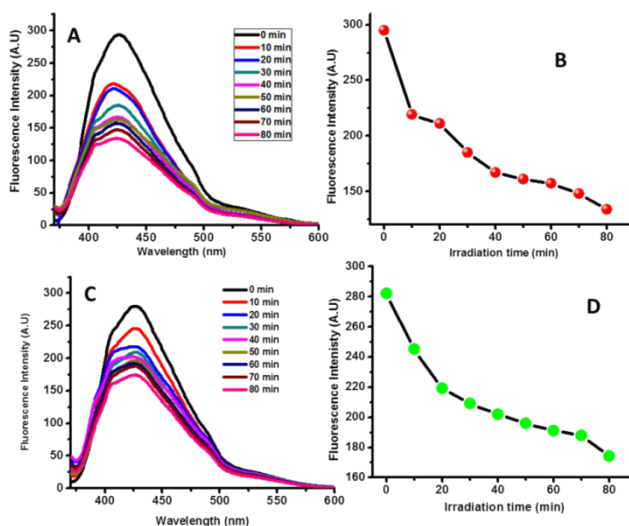

**Fig.S.I.19:** Fluorescence spectra of A) **(Z)CNS(MOP) $_2$** , C) **(Z)G1cCNS(MOP) $_2$** , upon irradiation with UV light (365 nm) in  $\text{CHCl}_3$ . Profiles of fluorescence emission intensity changes at  $\lambda_{\text{em}} = 430$  nm against irradiation time in min B) **(Z)CNS(MOP) $_2$**  and D) **(Z)G1cCNS(MOP) $_2$** .

Note:  $\lambda_{\text{ex}} = 360$  nm.



### S.I. 4.3: AIE studies.

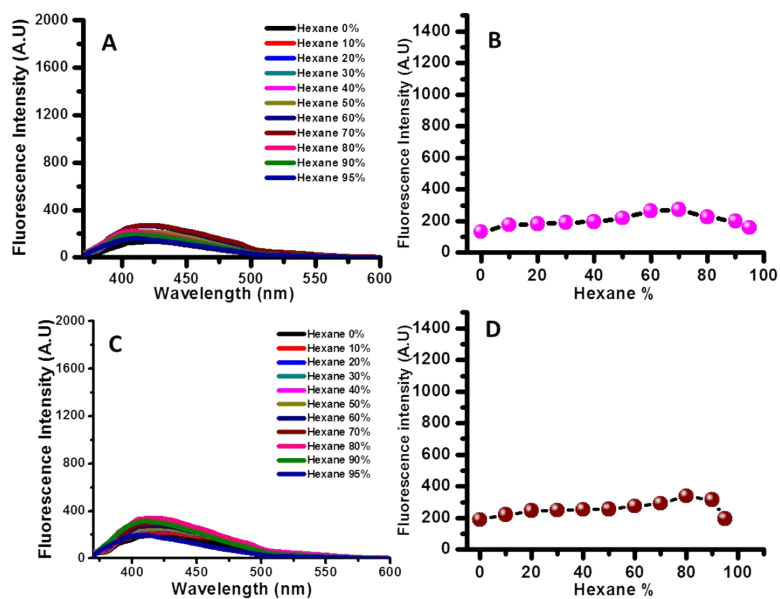

**Fig.S.I.20:** Fluorescence spectra of UV irradiated A) (E)CNS(MOP)<sub>2</sub>, C) (E)G1cCNS(MOP)<sub>2</sub>, in CHCl<sub>3</sub>-Hexane mixture with increasing the proportion of hexane from 0-95%. Profiles of fluorescence emission intensity changes at  $\lambda_{em} = 430$  nm against hexane proportion B) (E)CNS(MOP)<sub>2</sub> and D) (E)G1cCNS(MOP)<sub>2</sub>. Note:  $\lambda_{ex} = 360$  nm.

**S.I. 5: Time-resolved fluorescence decay of (Z)CNS(P5)<sub>2</sub> and (Z)G1CCNS(P5)<sub>2</sub>.**

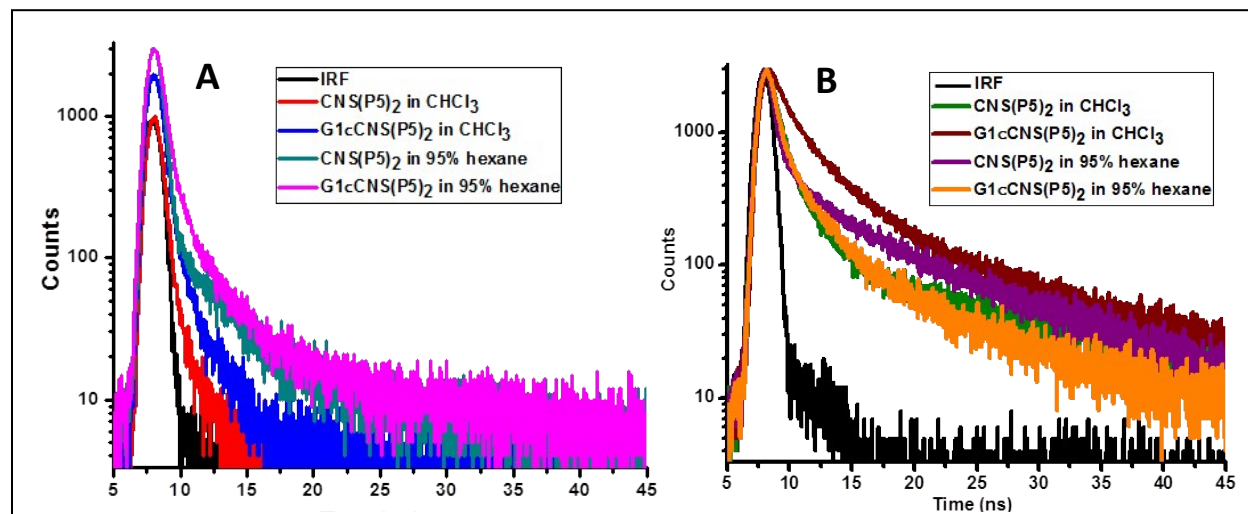

**Fig. S.I. 21:** Fluorescence decay of (Z)CNS(P5)<sub>2</sub> and (Z)G1CCNS(P5)<sub>2</sub> A) before irradiation, B) after UV irradiation.

| S.No | Sample                   | Fluorescence Life Time (ns) |
|------|--------------------------|-----------------------------|
| 1    | Host                     | 0.2066                      |
| 2    | Host-Guest               | 0.28                        |
| 3    | Host in 95% hexane       | 0.8536                      |
| 4    | Host-Guest in 95% hexane | 0.9123                      |
| 5    | Host                     | 4.7656                      |
| 6    | Host-Guest               | 5.8756                      |
| 7    | Host in 95% hexane       | 5.22                        |
| 9    | Host-Guest in 95% hexane | 2.744                       |

**S.I. 6: Reference:**

1. M. M. Abadía, B. R. Hernández, B. Villacampa, M. R. de la Fuente, R. Giménez and M. B. Ros, *J. Mater. Chem. C*, 2015, **3**, 3038.
2. Y. Zhou, K. Jie, B. Shi and Y. Yao, *Chem. Commun.*, 2015, **51**, 11112.
